# Supplementary material
Source: publisher figshare collection journal article supplement (https://acs.figshare.com/ndownloader/files/4399888)
Supplement: Supplementary file 1 [file 4399888]

Supporting Information

# Epitaxial Growth and Composition-dependent Optical Properties of Vertically Aligned $\text{ZnS}_{1-x}\text{Se}_x$ Alloy Nanowire Arrays

*Yao Liang, Haiyang Xu, and Suikong Hark\**

Department of Physics, The Chinese University of Hong Kong, Shatin, Hong Kong, China

E-mail: [skhark@phy.cuhk.edu.hk](mailto:skhark@phy.cuhk.edu.hk)

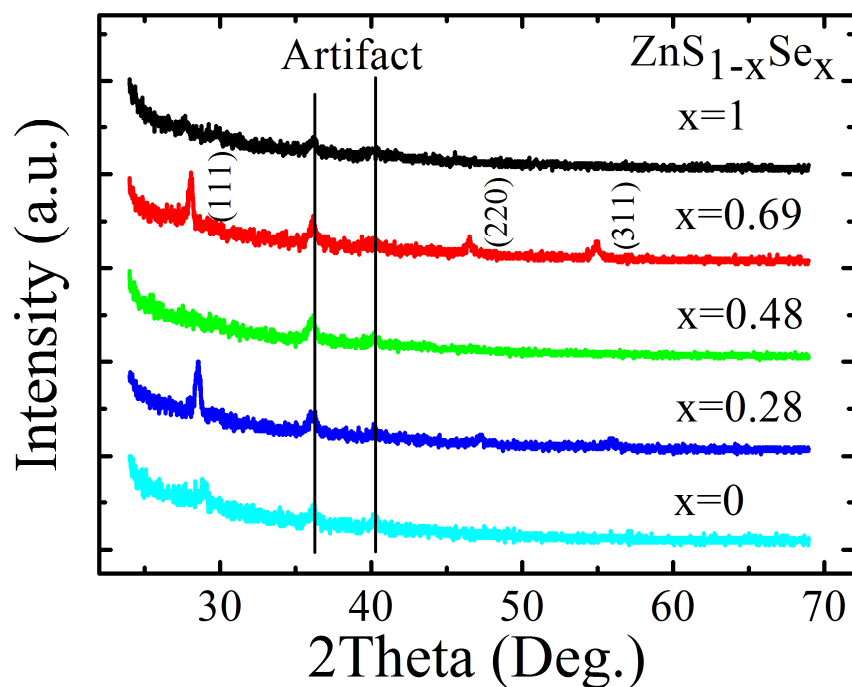

Figure S1. XRD patterns taken from the samples of different compositions. The samples were tilted by several degrees to suppress the intensity of (111) peak.

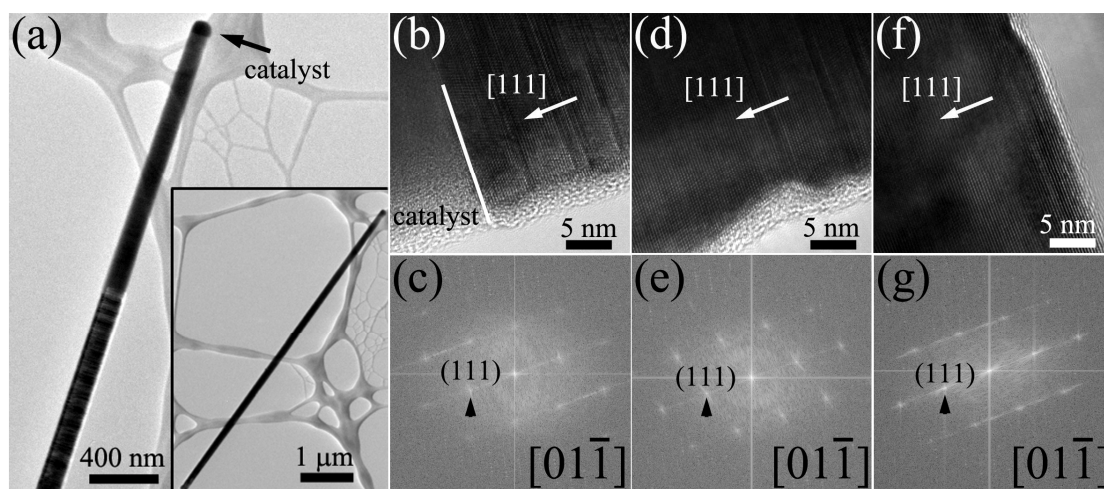

Figure S2. A typical  $\text{ZnS}_{0.31}\text{Se}_{0.69}$  nanowire. (a) A catalyst particle is pointed out by the arrow. Inset shows the whole nanowire. The HRTEM images and the corresponding FFT patterns taken from (b) & (c) near the tip; (d) & (e) in the middle; and (f) & (g) near the end of the nanowire.

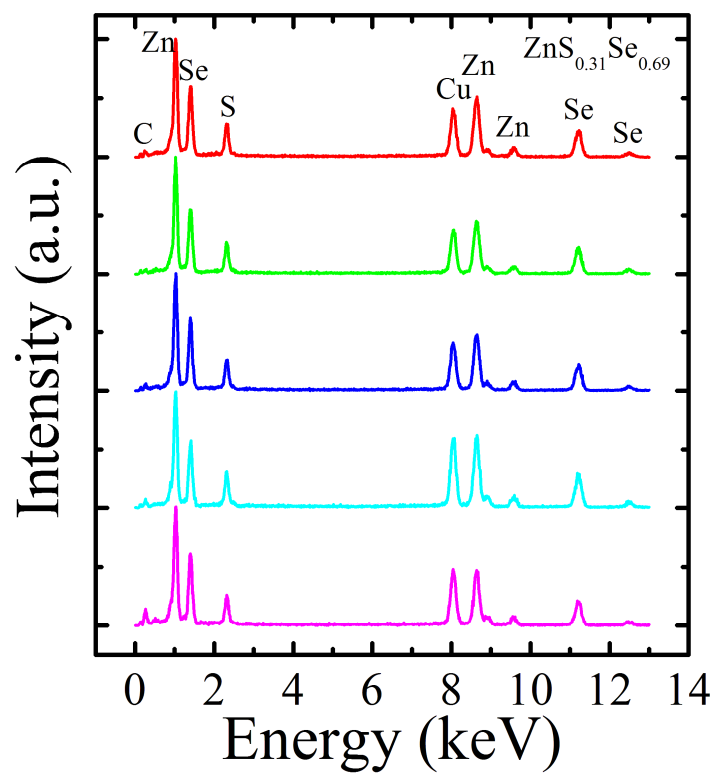

Figure S3. EDX spectra taken from different regions of the  $\text{ZnS}_{0.31}\text{Se}_{0.69}$  nanowire along its growth direction.

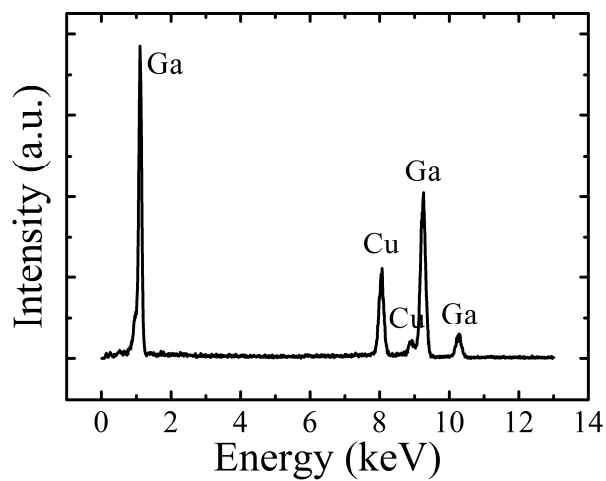

Figure S4. An EDX spectrum taken from the catalyst, confirming that metal Ga acts as catalyst.
